# Supplementary material for: Aerobic exercise attenuates high-fat diet-induced glycometabolism impairments in skeletal muscle of rat: role of EGR-1/PTP1B signaling pathway
Source: PubMed Central journal article supplement — Nutr Metab (Lond). 2024 Dec 31;21:113. doi: 10.1186/s12986-024-00888-8 (PMC11686907; doi:10.1186/s12986-024-00888-8), 2024-12-31

# Body weight data of rats (g)

| Group<br>Week | CON |     |     |     |     |     |     |     | HFD |     |     |     |     |     |     |     | HE  |     |     |     |     |     |     |     |
|---------------|-----|-----|-----|-----|-----|-----|-----|-----|-----|-----|-----|-----|-----|-----|-----|-----|-----|-----|-----|-----|-----|-----|-----|-----|
|               | 0   | 320 | 348 | 339 | 344 | 335 | 310 | 334 | 330 | 313 | 326 | 327 | 326 | 320 | 320 | 325 | 323 | 326 | 318 | 358 | 333 | 320 | 331 | 327 |
| 1             | 365 | 396 | 386 | 392 | 377 | 351 | 385 | 376 | 366 | 390 | 389 | 385 | 384 | 372 | 390 | 384 | 392 | 365 | 386 | 387 | 354 | 384 | 372 | 332 |
| 2             | 408 | 439 | 443 | 435 | 425 | 387 | 434 | 425 | 412 | 445 | 450 | 443 | 446 | 420 | 449 | 434 | 434 | 396 | 420 | 426 | 384 | 432 | 408 | 357 |
| 3             | 434 | 467 | 454 | 453 | 445 | 406 | 464 | 447 | 440 | 480 | 483 | 481 | 486 | 457 | 492 | 475 | 474 | 416 | 450 | 461 | 412 | 467 | 437 | 392 |
| 4             | 437 | 489 | 468 | 471 | 464 | 426 | 489 | 465 | 462 | 515 | 521 | 507 | 522 | 487 | 530 | 505 | 507 | 432 | 472 | 493 | 425 | 495 | 462 | 403 |
| 5             | 456 | 512 | 489 | 507 | 492 | 458 | 512 | 495 | 486 | 541 | 566 | 539 | 563 | 516 | 583 | 542 | 526 | 446 | 480 | 517 | 440 | 532 | 479 | 419 |
| 6             | 472 | 545 | 514 | 533 | 518 | 477 | 547 | 514 | 520 | 574 | 600 | 569 | 594 | 545 | 631 | 577 | 570 | 477 | 510 | 538 | 455 | 560 | 523 | 435 |

Repeat 1

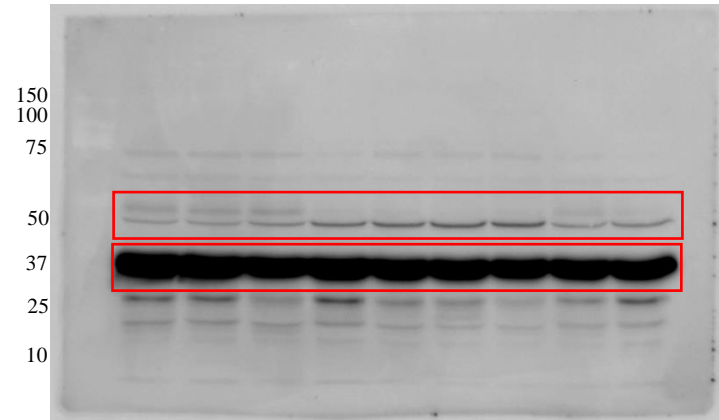

Repeat 2

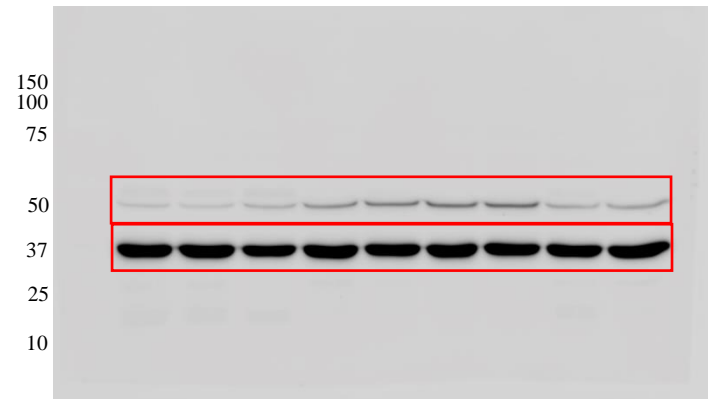

Repeat 3

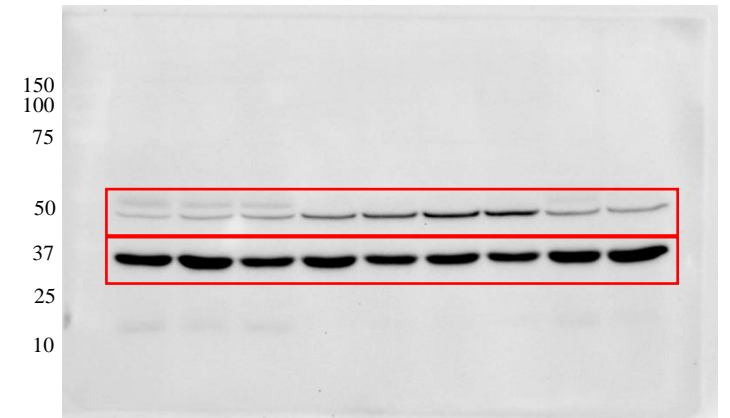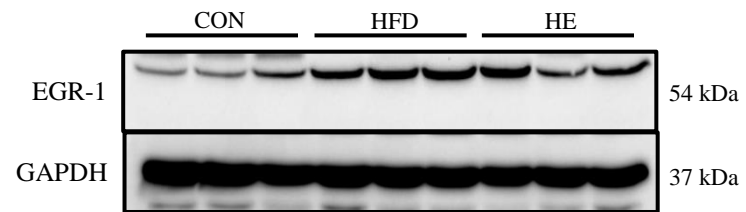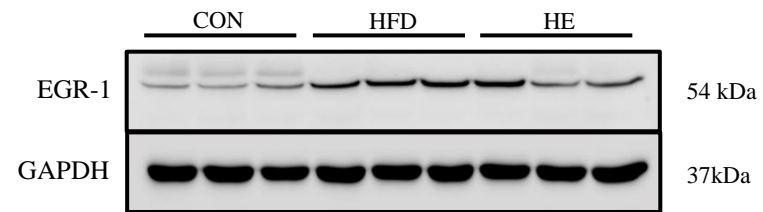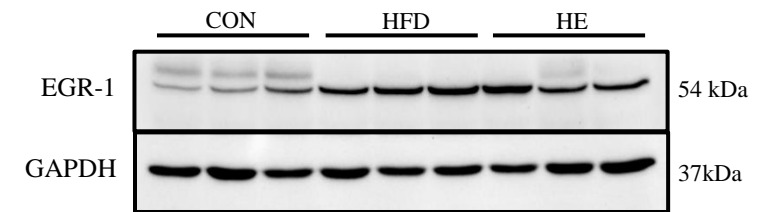

Repeat 1

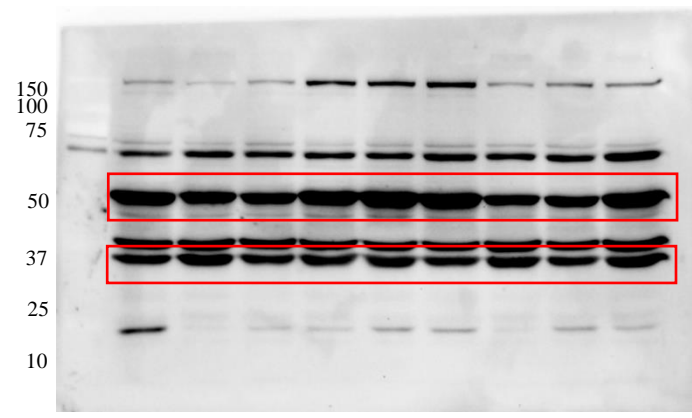

Repeat 2

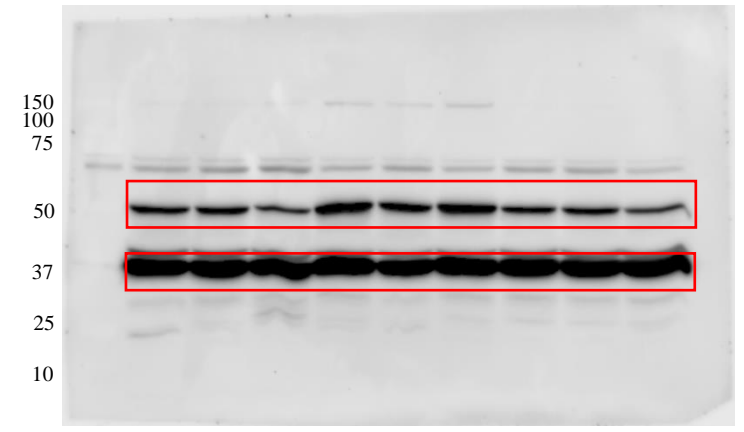

Repeat 3

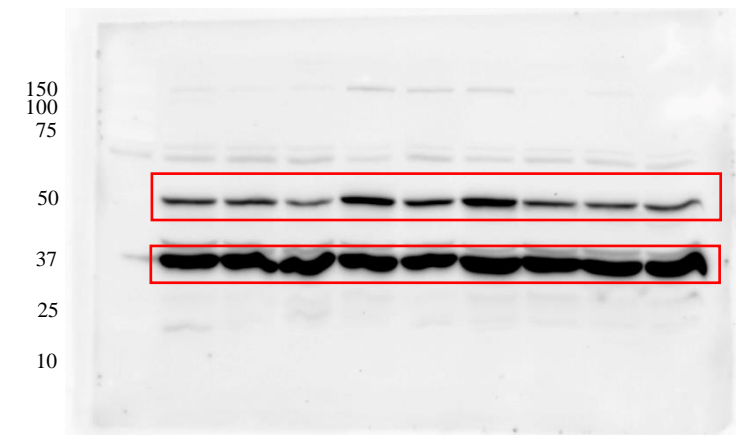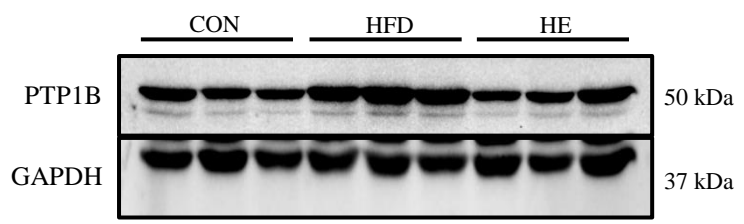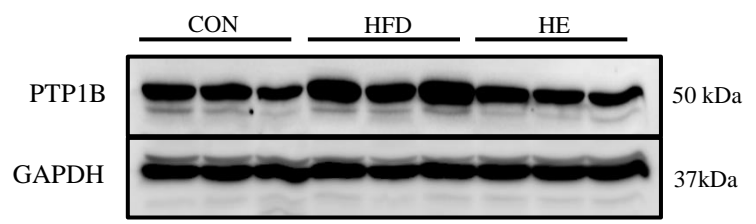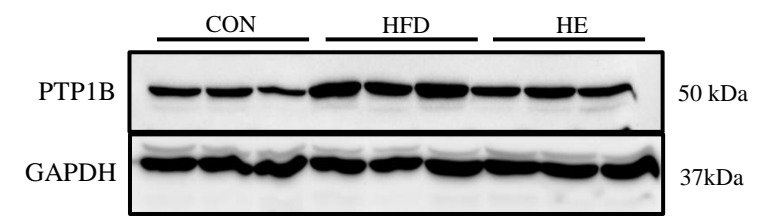

Repeat 1

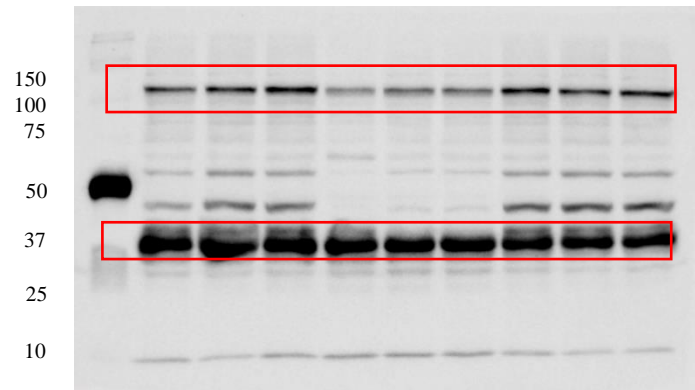

Repeat 2

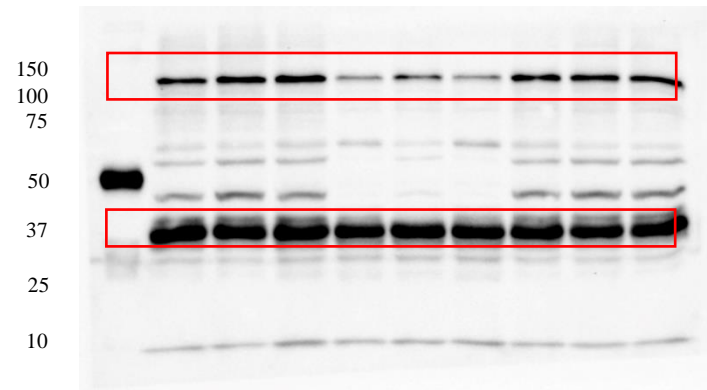

Repeat 3

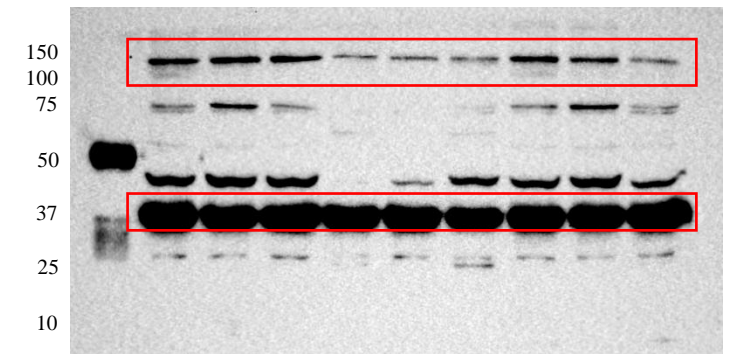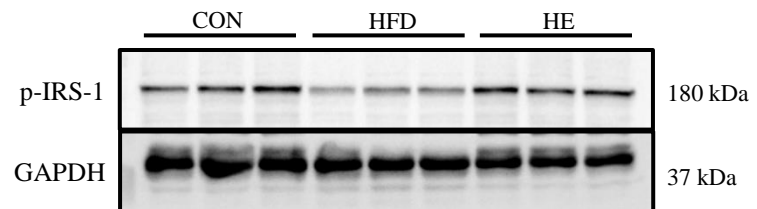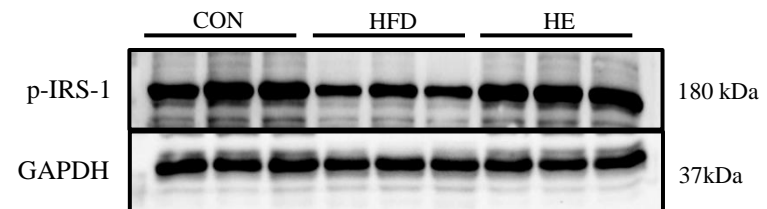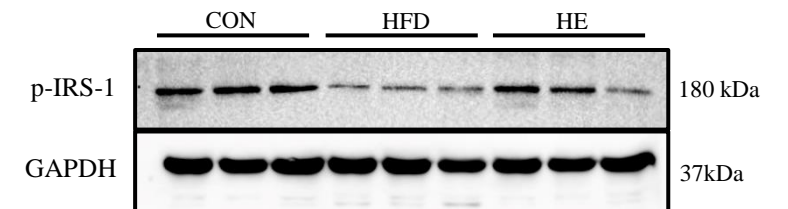

Repeat 1

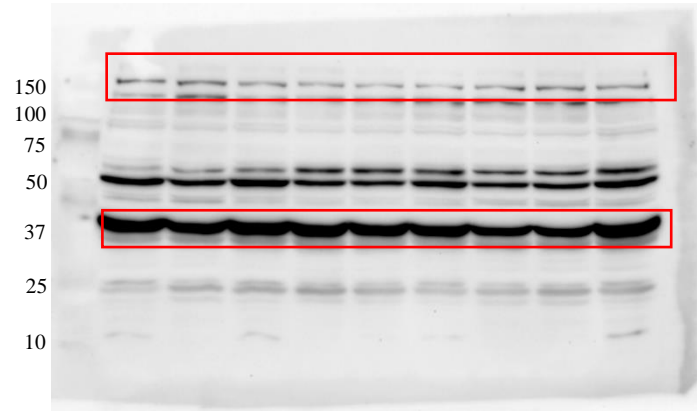

Repeat 2

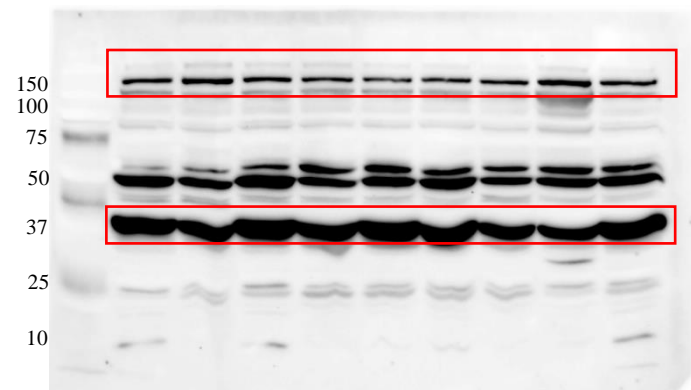

Repeat 3

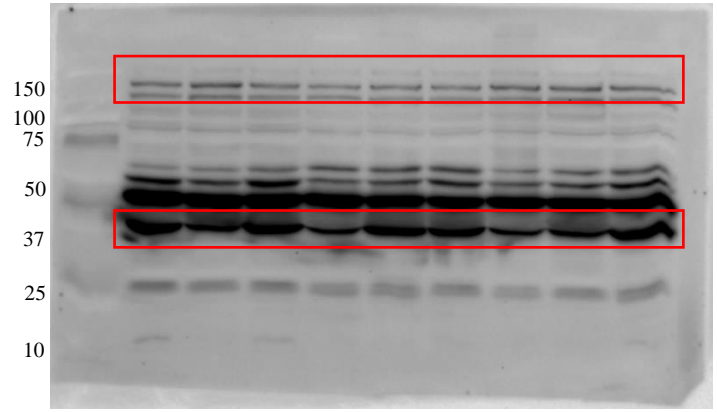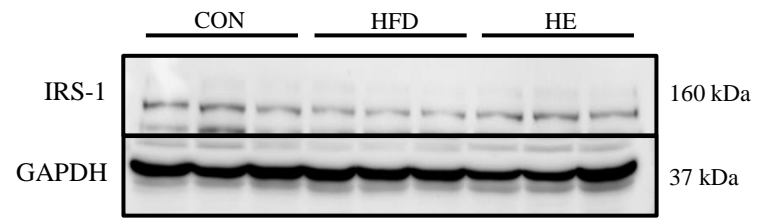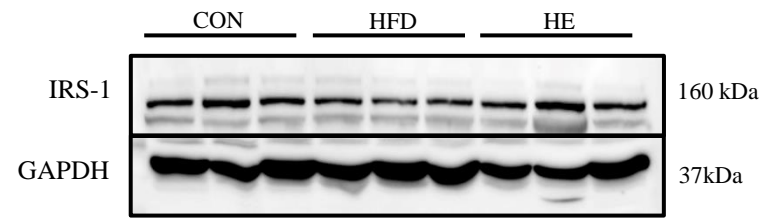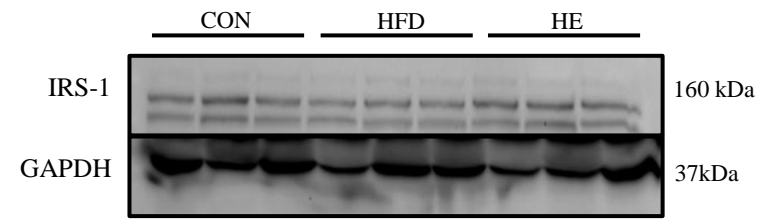

Repeat 1

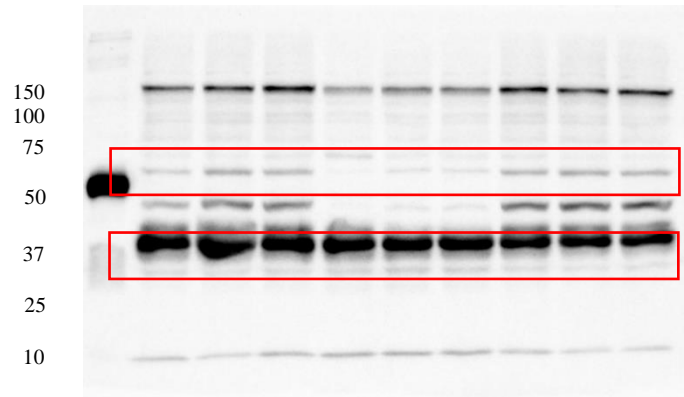

Repeat 2

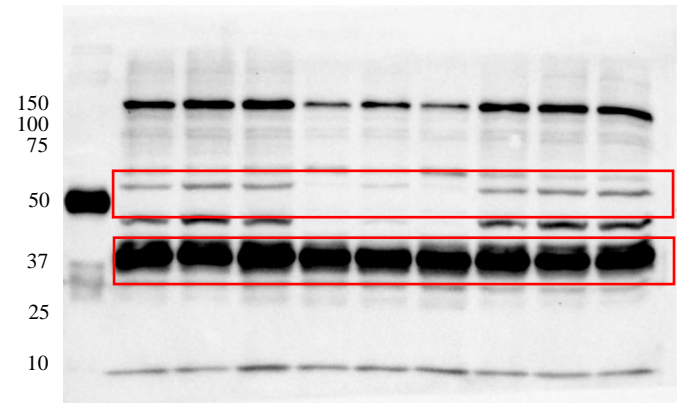

Repeat 3

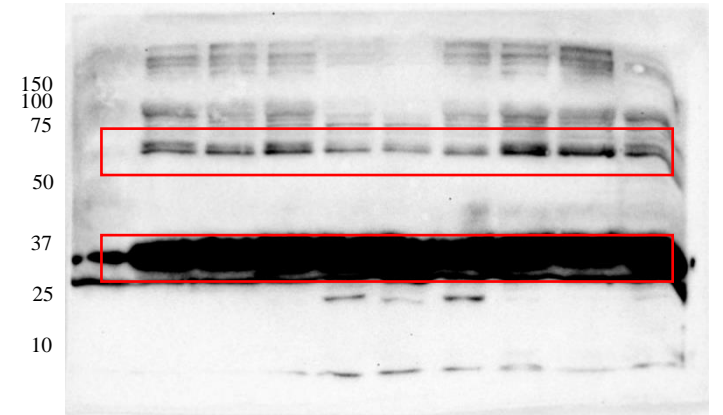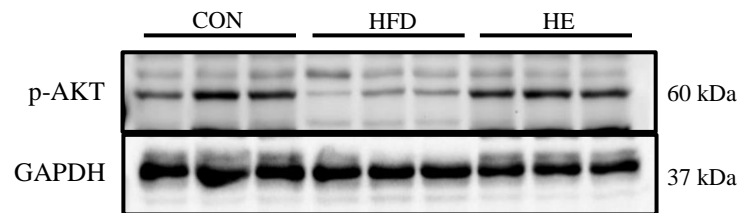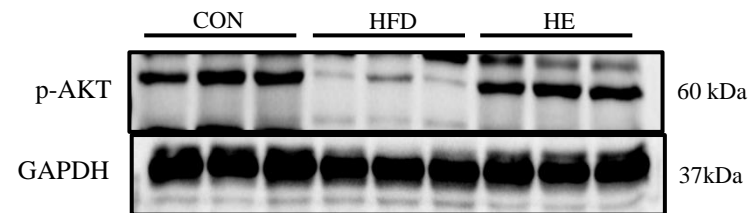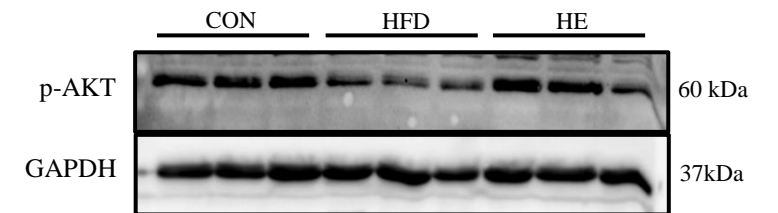

Repeat 1

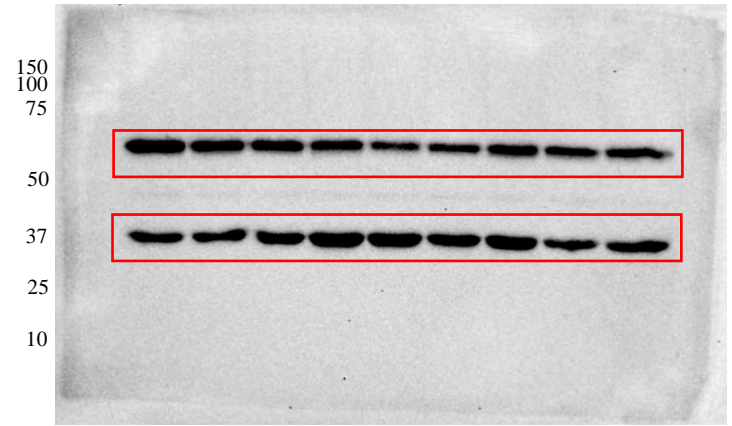

Repeat 2

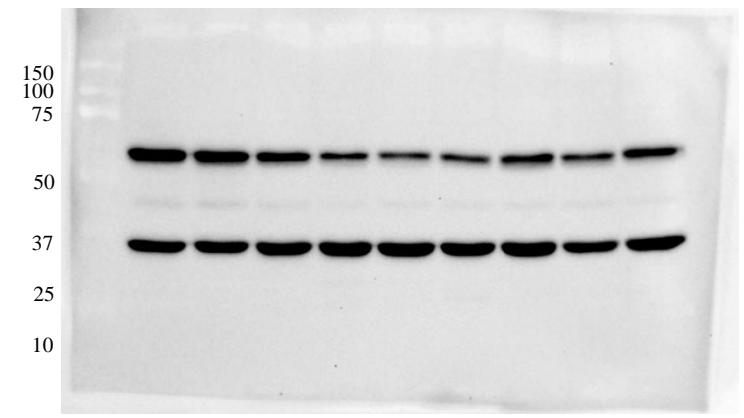

Repeat 3

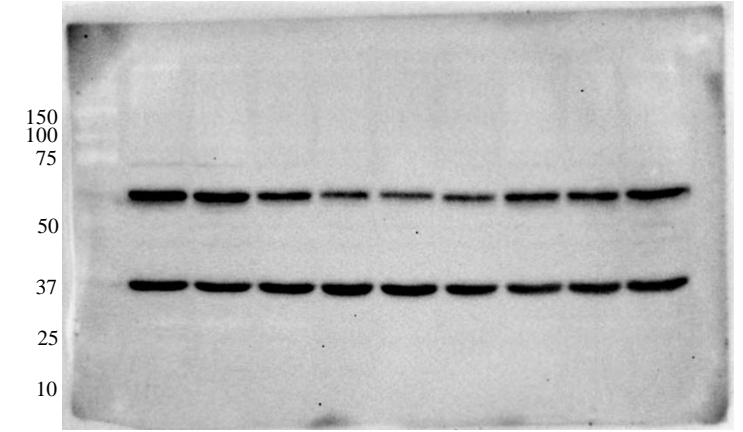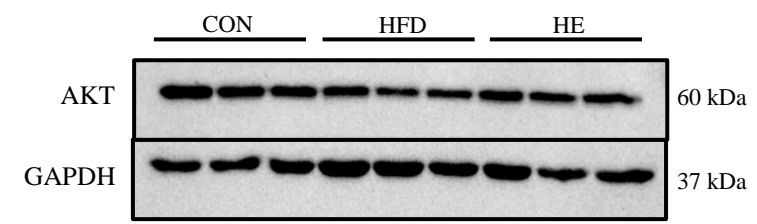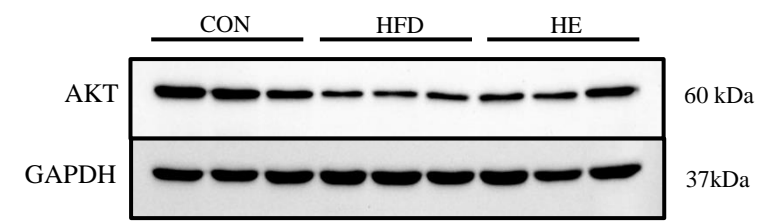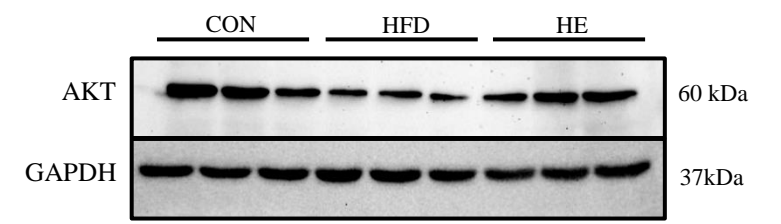



Repeat 1

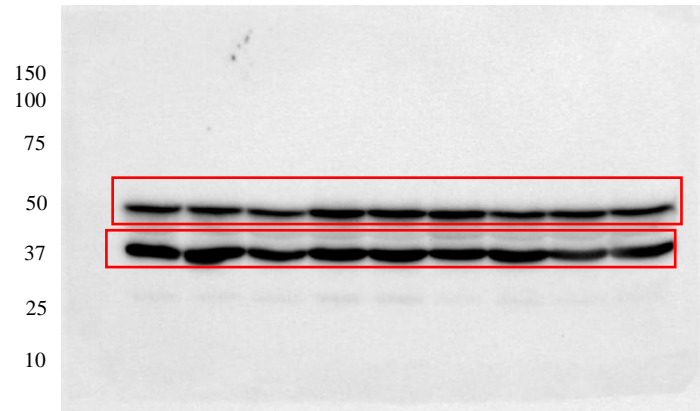

Repeat 2

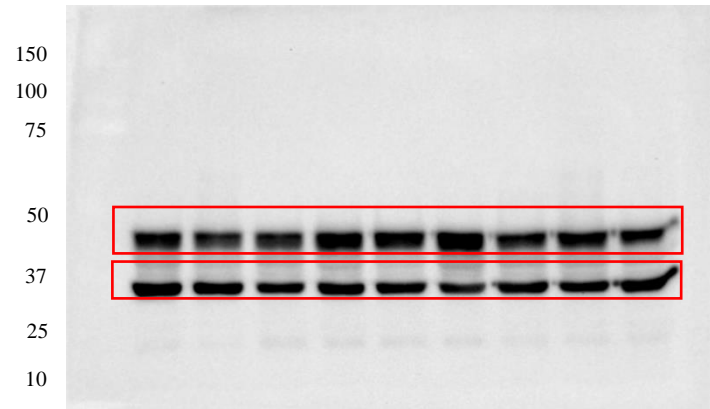

Repeat 3

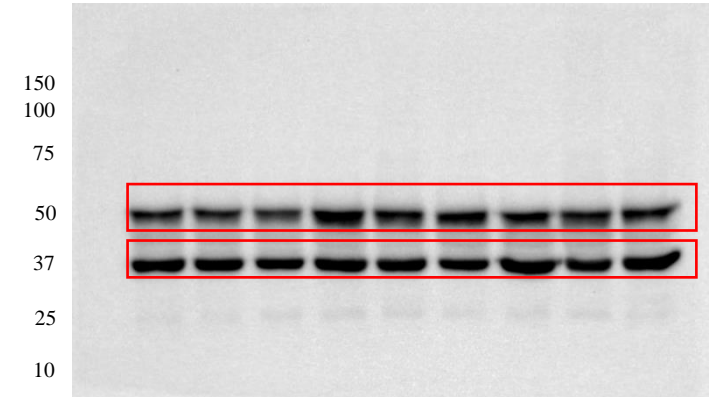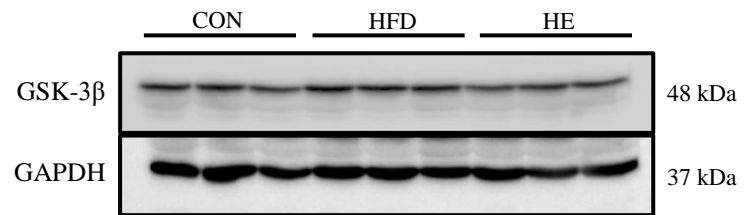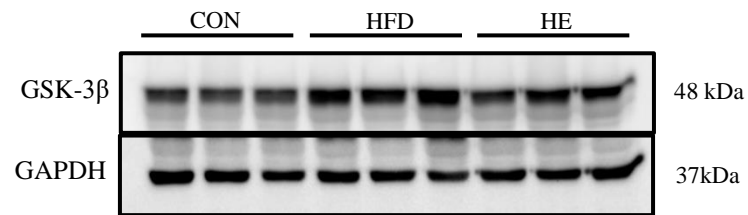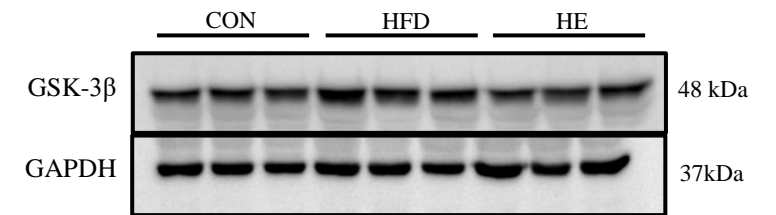



Repeat 1

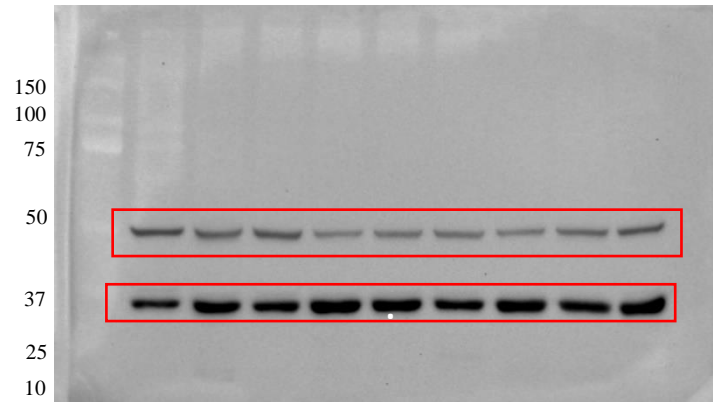

Repeat 2

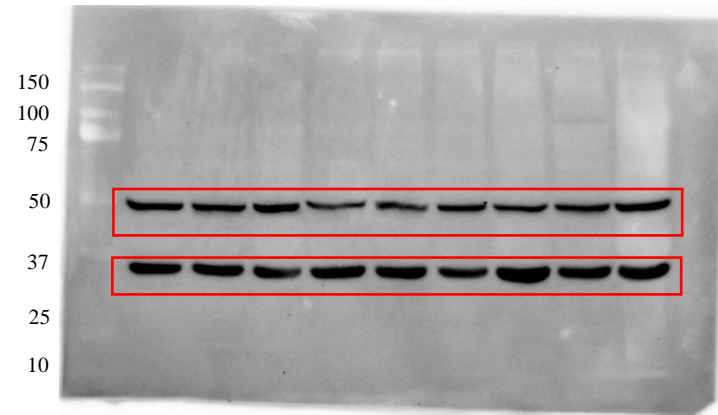

Repeat 3

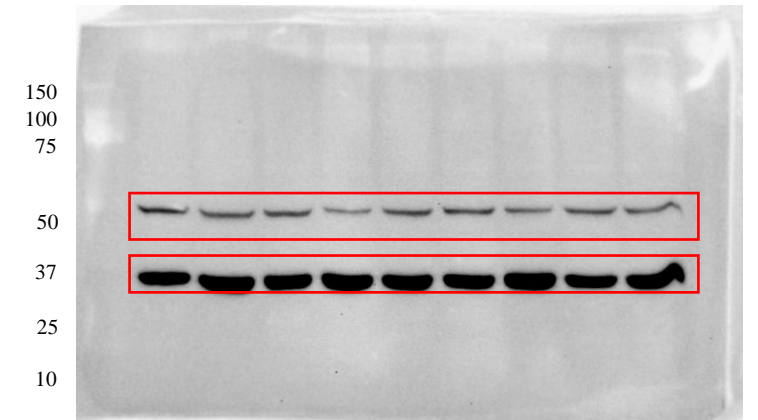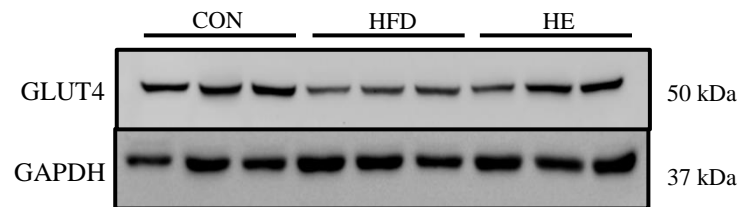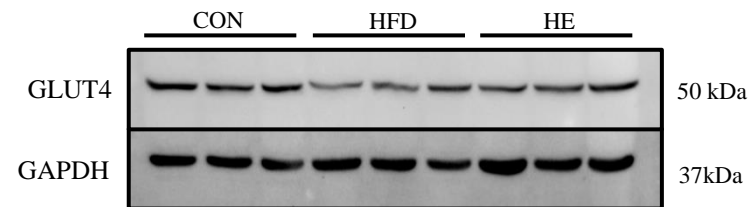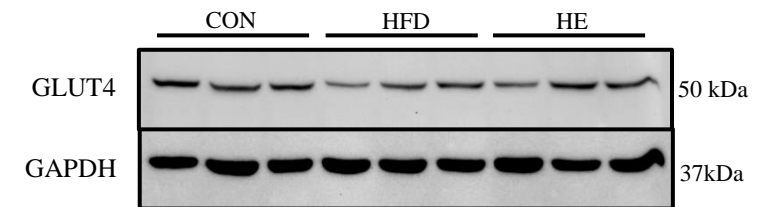

Supplement: 12986_2024_888_MOESM1_ESM.pdf [file 12986_2024_888_MOESM1_ESM.pdf]
